# Supplementary material for: Exploring the Causality Between Hypothyroidism and Non-alcoholic Fatty Liver: A Mendelian Randomization Study
Source: PubMed Central journal article supplement (PMC8005565; doi:10.3389/fcell.2021.643582), 2021-03-15
Supplement: Image_1.pdf [file Image_1.pdf]

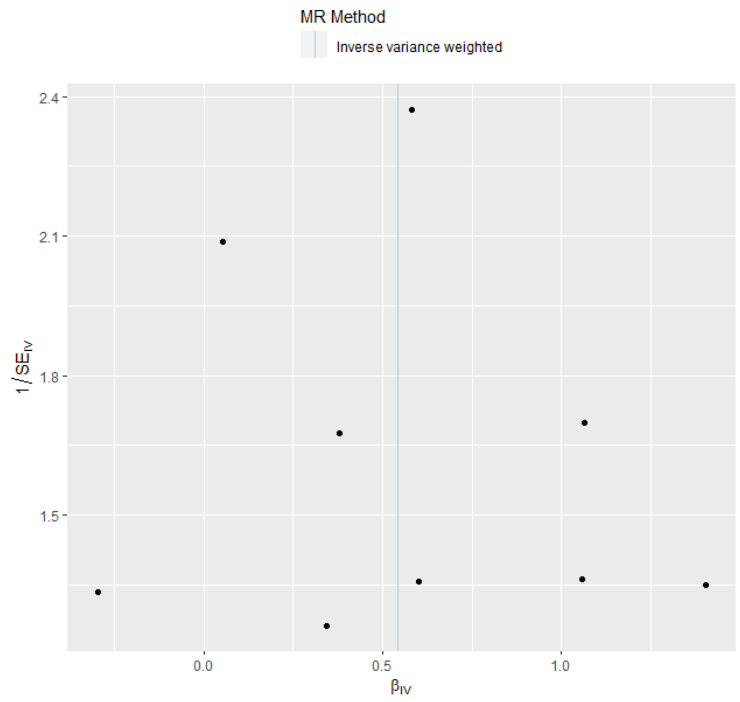

**Supplementary Figure 1** | The funnel plot. The symmetry of the funnel plot explains the absence of horizontal pleiotropy.
